# Supplementary material for: Tunable Magneto-Plasmonic Nanosensor for Sensitive Detection of Foodborne Pathogens
Source: MDPI journal article supplement (doi:10.3390/bios13010109), 2023-01-07
Supplement: s1 [file s1]

# Tunable Magneto-Plasmonic Nanosensor For Sensitive Detection of Foodborne Pathogens

Tuhina Banerjee <sup>2,\*</sup>, Nilamben Panchal <sup>1</sup>, Carissa Sutton <sup>2</sup>, Rebekah Elliott <sup>1</sup>, Truptiben Patel <sup>1</sup>, Kajal Kajal <sup>1</sup>, Eniola Arogunyo <sup>1</sup>, Neelima Koti <sup>1</sup> and Santimukul Santra <sup>1,\*</sup>

<sup>1</sup> Department of Chemistry, College and Arts and Sciences, Pittsburg State University, 1701 S. Broadway Street, Pittsburg, KS 66762, USA

<sup>2</sup> Department of Chemistry and Biochemistry, College of Natural and Applied Sciences, Missouri State University, 901 S. National Avenue, Springfield, MO 65897, USA

\* Correspondence: tbanerjee@missouristate.edu (T.B.); ssantra@pittstate.edu (S.S.)

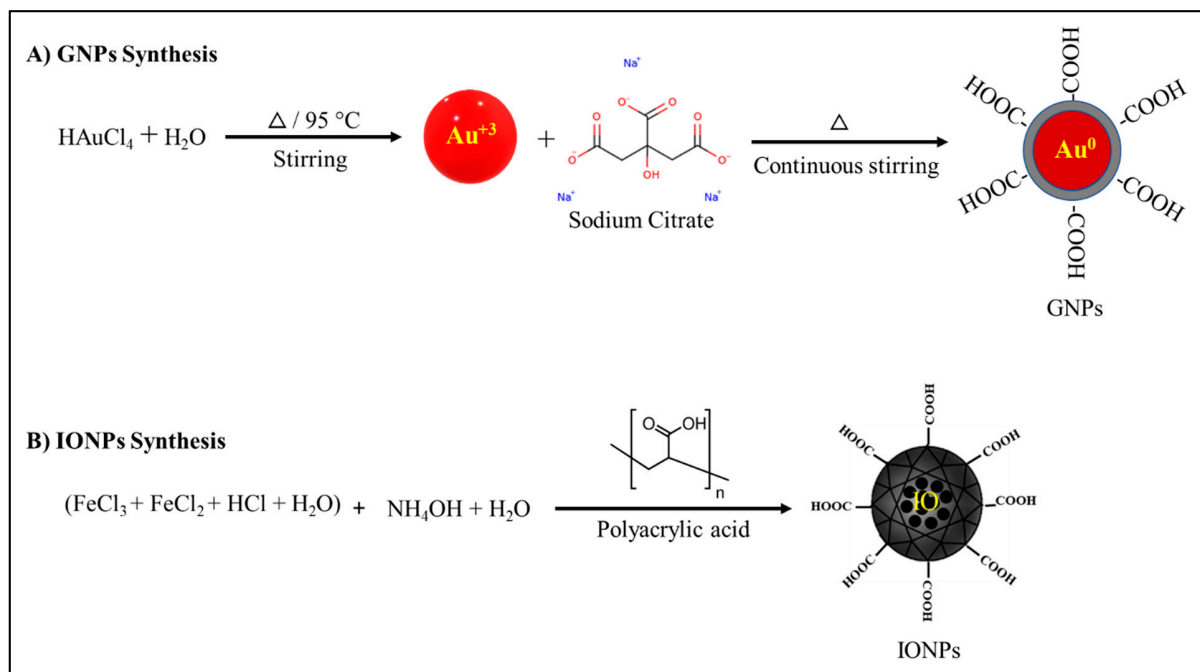

**Scheme S1.** Schematic presentations of the syntheses of **A)** gold nanoparticles (GNPs) and **B)** iron oxide nanoparticles (IONPs).

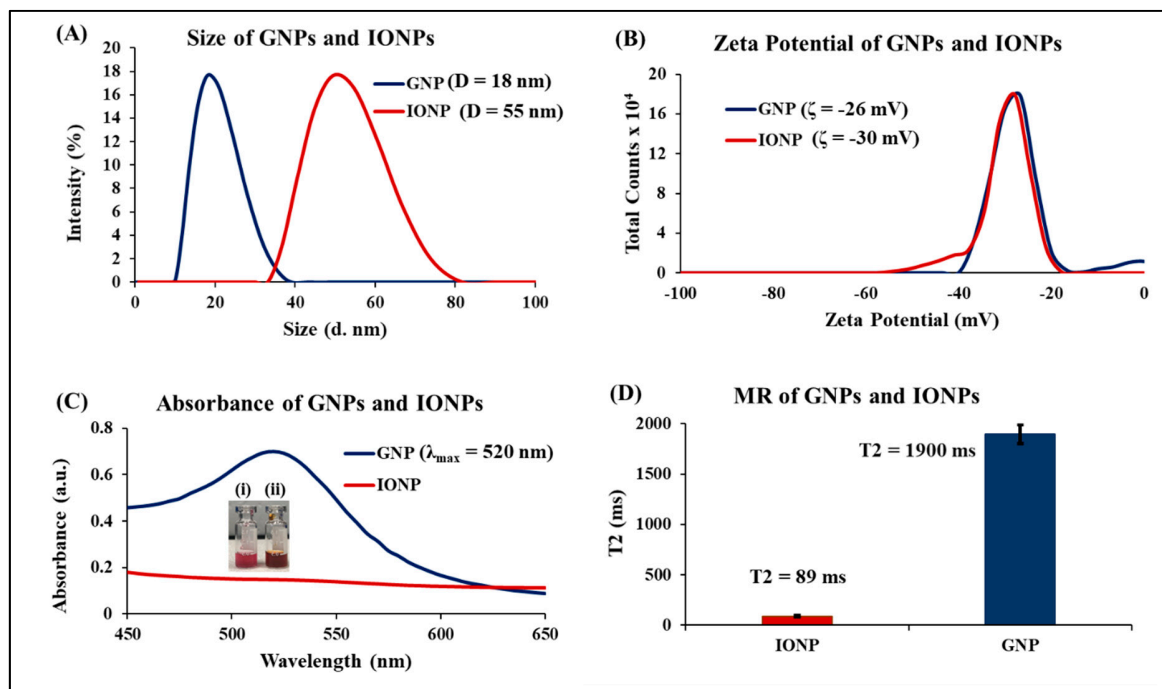

**Figure S1.** Characterization studies of IONPs and GNPs. **(A)** Average diameters of GNPs and IONPs, **(B)** zeta potentials of GNPs and IONPs, **(C)** UV-Vis absorption spectra (SPR) of GNPs and IONPs, inset: corresponding images of (i) GNPs and (ii) IONPs solutions. **(D)** T2 values of the nanoparticles, indicating GNPs are non-magnetic.

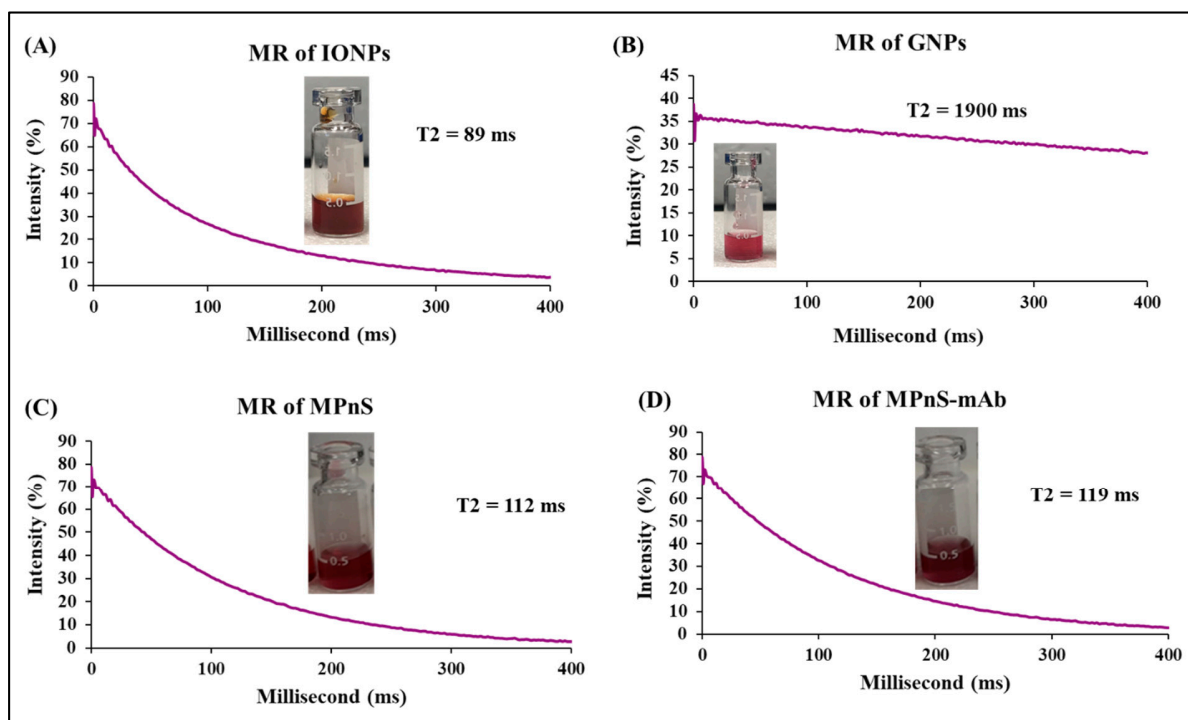

**Figure S2.** Spin-spin magnetic relaxation (T<sub>2</sub> MR) plots of (A) IONPs, (B) GNPs, (C) and (D) MPnS and its conjugate. Inset showing the color of original nanoparticles.

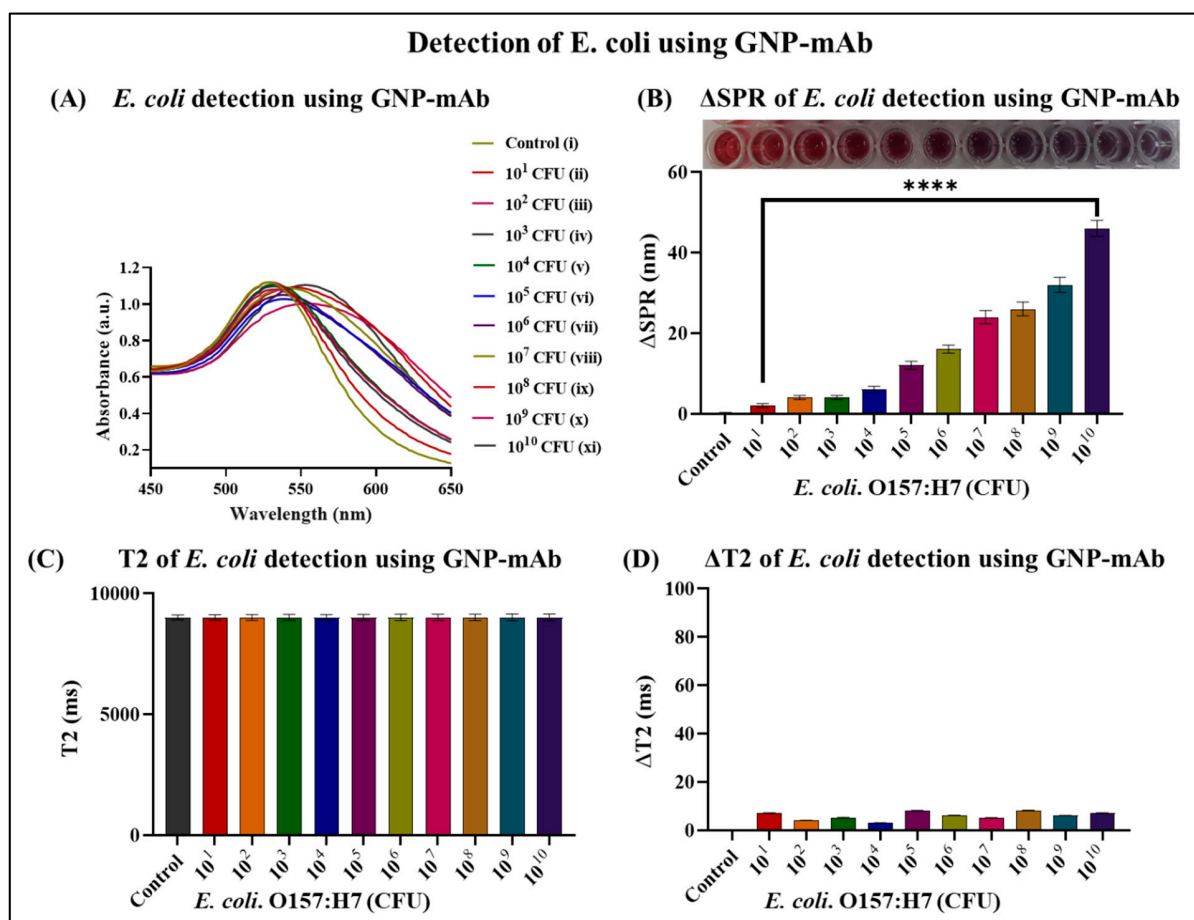

**Figure S3.** Detection of *E. coli* O157:H7 using GNPs-mAb. Increasing CFUs of *E. coli* O157:H7 was added using antibody functionalized GNPs. **(A)** Representative UV-Vis spectra at different CFU concentrations of target pathogen. **(B)**  $\Delta$ SPR changes and colorimetric readout in response to different CFUs. **(C)** T2 values and corresponding **(D)**  $\Delta$ T2 values for the pathogen detection, indicating MR modality is not applicable for GNPs-based detections.

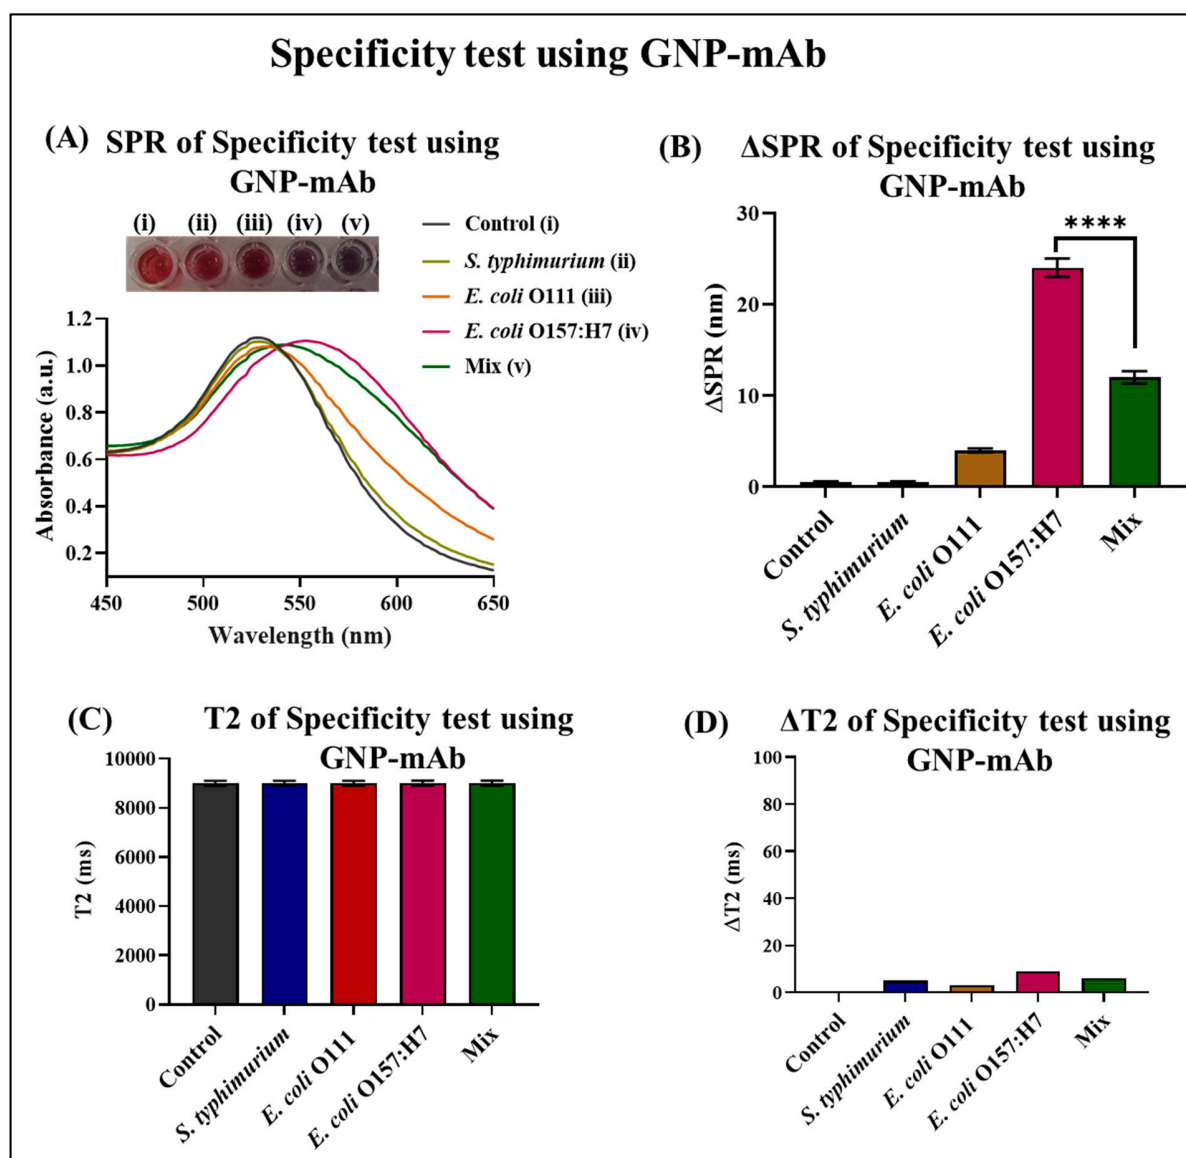

**Figure S4.** Determination of *E. coli* O157:H7 detection specificity of antibody conjugated GNPs in simple buffer in the presence of other bacterial cross-contaminants. **(A-B)** UV-Vis measurements and color changes indicative of detection, which showed in the changes in absorption maxima  $\Delta$ SPR. **(C)** T2 values and **(D)** and corresponding  $\Delta$ T2 were determined for different CFUs of target bacteria in simple buffer. No conclusive results obtained using magnetic relaxometer.

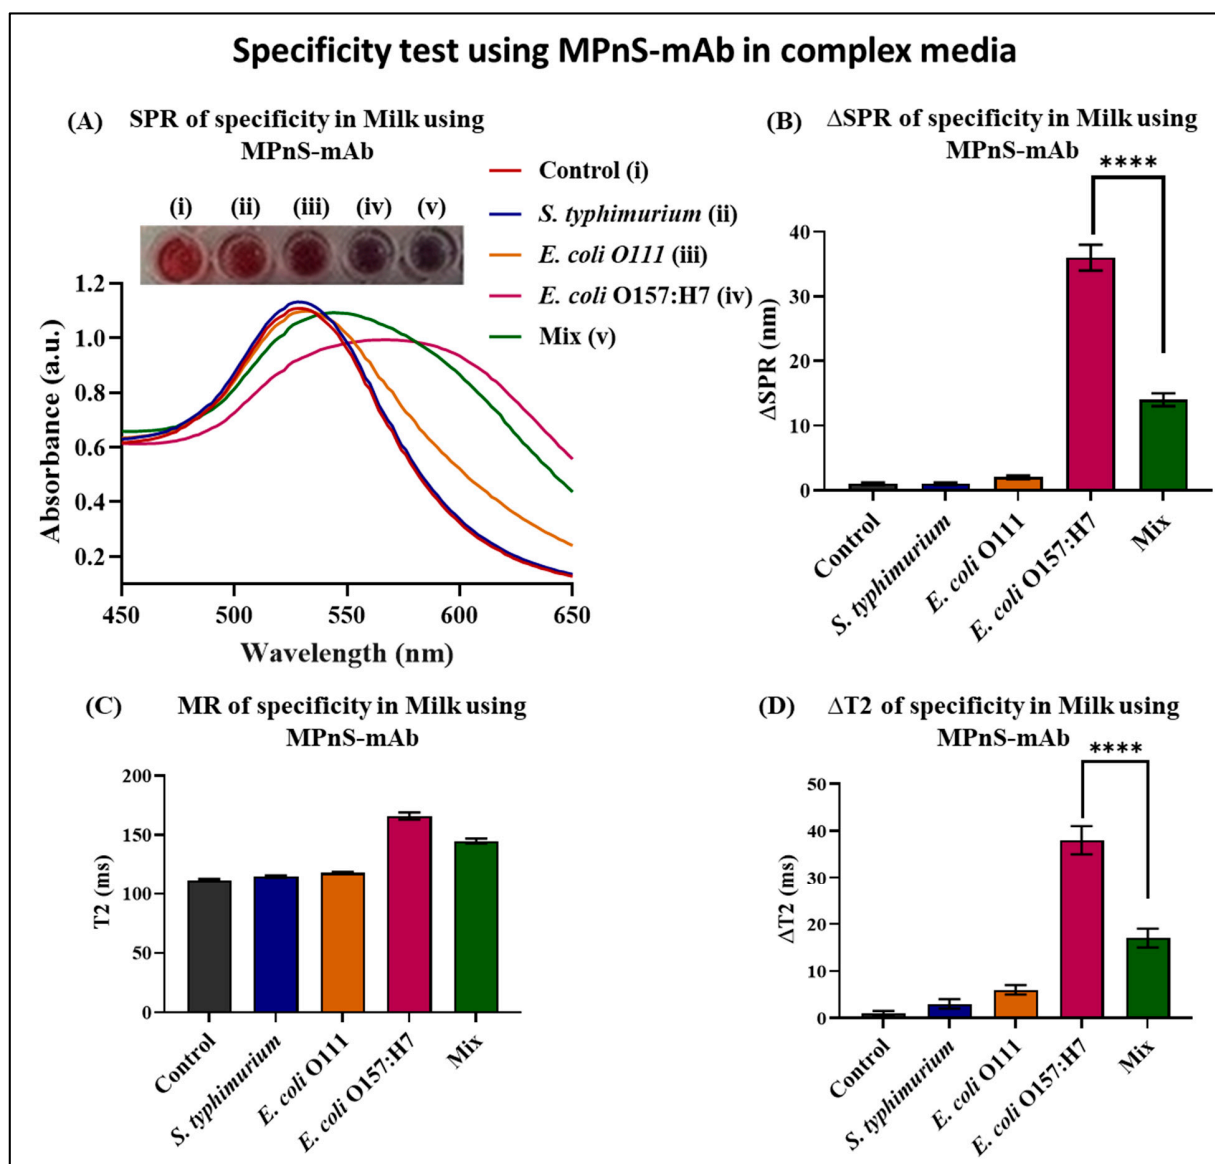

**Figure S5.** Determination of detection specificity of MPnS-mAb in complex media in the presence of other bacterial cross-contaminants. **(A)** UV-Vis measurements and color changes, and **(B)** changes in absorption maxima ( $\Delta$ SPR) indicated specificity in detection was not compromised in complex media. **(C and D)** T2 MR values and corresponding  $\Delta$ T2 values were determined for different CFUs of target bacteria spiked in milk, further indicated magnetic relaxation properties of MPnS is independent of media turbidity.

| Sensor Type                                               | LOD (CFUs/mL)     | Ref |
|-----------------------------------------------------------|-------------------|-----|
| AuNP-Immunochromatographic assay                          | 12.5              | 60  |
| ELISA                                                     | $1 \times 10^4$   | 61  |
| Chemiluminescence biosensor                               | 130               | 62  |
| Fluorescent microsphere-based Immunochromatographic assay | $3 \times 10^5$   | 63  |
| Microfluidic Biosensor                                    | 10                | 64  |
| Polydopamine-NP-assisted polymerase chain reaction        | $6.7 \times 10^4$ | 65  |
| Gold-Shell Silica-Core Nanospheres                        | 100               | 66  |

**Table S1.** Specific detection of *Escherichia coli* O157:H7 using different sensing platforms.
